# Supplementary material
Source: publisher figshare collection journal article supplement (https://acs.figshare.com/ndownloader/files/14162339)
Supplement: Supplementary file 1 [file 14162339]

# **Unraveling the Factors Affecting the Electrochemical Performance of MoS<sub>2</sub>–Carbon Composite Catalysts for Hydrogen Evolution Reaction: Surface Defect and Electrical Resistance of Carbon Supports**

Yuhwan Hyeon,<sup>†,#</sup> Su-Ho Jung,<sup>†,#</sup> Wonseok Jang,<sup>‡</sup> Mansu Kim,<sup>‡</sup> Byung-Sung Kim,<sup>§</sup> Jae-Hyun Lee,<sup>||</sup> Koteeswara Reddy Nandanapalli,<sup>‡</sup> Namgee Jung<sup>\*,<sup>⊥</sup></sup> and Dongmok Whang<sup>\*,<sup>†,‡</sup></sup>

<sup>†</sup>SKKU Advanced Institute of Nanotechnology (SAINT) and <sup>‡</sup>School of Advanced Materials Science and Engineering, Sungkyunkwan University, Suwon 16419, Republic of Korea

<sup>§</sup>Department of Engineering Science, University of Oxford, Oxford OX1 3PJ, U.K.

<sup>||</sup>Department of Energy Systems Research and Department of Materials Science and Engineering, Ajou University, Suwon 16499, Republic of Korea

<sup>⊥</sup>Graduate School of Energy Science and Technology (GEST), Chungnam National University, Daejeon 34148, Republic of Korea

\*Corresponding authors: njung@cnu.ac.kr (N. Jung), dwhang@skku.ac.kr (D. Whang)

### 1. Calculation of the number of active sites & turnover frequency (TOF)

To calculate the number of active sites of MoS<sub>2</sub> catalysts, cyclic voltammetry (CV) measurements were carried out in phosphate buffer solution (pH = 7). Before the measurements, phosphate buffer solution was deaerated by N<sub>2</sub> gas purging. The potential window was between -0.2 and 0.6 V versus reversible hydrogen electrode (RHE), and the scan rate was 50 mV/s for the CV measurements. The number of active sites of MoS<sub>2</sub> was calculated by equation (1).

$$n = Q/2F \quad \dots\dots\dots (1)$$

n; The number of active sites [mol]

Q; Voltammetric charges [C]

F; Faraday constant [96,485 C/mol]

First, the voltammetric charges obtained from the CVs in Figure 2e were divided by “2”. The result was then divided by Faraday constant to get the total number of active sites of MoS<sub>2</sub> catalysts. Table S1 shows the total number of active sites and the number of active sites per area (0.25 cm<sup>2</sup>).

When the number of active sites is known, the turnover frequencies can be calculated by equation (2).

$$\text{TOF} = I/2Fn \quad \dots\dots\dots (2)$$

I; Current obtained from polarization curve [A]

F; Faraday constant [96,485 C/mol]

n; The number of active sites [mol]

The current value should be divided by “2” since two electrons are involved in the formation of a H<sub>2</sub> molecule from two protons.

**Table S1.** The number of active sites (or divided by geometric area) calculated from CVs.

| <b>Sample</b>                                                           | <b>MoS<sub>2</sub>/GCS@SiO<sub>2</sub><br/>(G0)</b> | <b>MoS<sub>2</sub>/GCS@SiO<sub>2</sub><br/>(G1)</b> | <b>MoS<sub>2</sub>/GCS@SiO<sub>2</sub><br/>(G2)</b> | <b>MoS<sub>2</sub>/GCS@SiO<sub>2</sub><br/>(G5)</b> |
|-------------------------------------------------------------------------|-----------------------------------------------------|-----------------------------------------------------|-----------------------------------------------------|-----------------------------------------------------|
| <b>The number of<br/>active sites (mol)</b>                             | $1.46 \times 10^{-8}$                               | $1.74 \times 10^{-8}$                               | $3.34 \times 10^{-8}$                               | $5.02 \times 10^{-8}$                               |
| <b>The number of<br/>active sites per<br/>area (mol/cm<sup>2</sup>)</b> | $5.83 \times 10^{-8}$                               | $6.96 \times 10^{-8}$                               | $1.33 \times 10^{-7}$                               | $2.00 \times 10^{-7}$                               |

## **2. Synthesis of MoS<sub>2</sub> NPs and preparation of working electrode using MoS<sub>2</sub> NPs**

MoS<sub>2</sub> nanoparticles (NPs) were prepared in the same manner as the synthesis of MoS<sub>2</sub> described in the main text except for the addition of GCS@SiO<sub>2</sub> NWs. To prepare the MoS<sub>2</sub> catalyst ink, MoS<sub>2</sub> NPs of 10 mg were well dispersed in a mixed solution of Nafion (60  $\mu$ L) and isopropyl alcohol (800  $\mu$ L). The catalyst ink solution was used to load the synthesized MoS<sub>2</sub> NPs on a Ti foil of 0.25 cm<sup>2</sup>. After the deposited catalyst ink was sufficiently dried under air conditions, the Ti foil covered with MoS<sub>2</sub> NPs was used as a working electrode for the HER.

### 3. Structures of pristine Si NW and oxidized Si NW

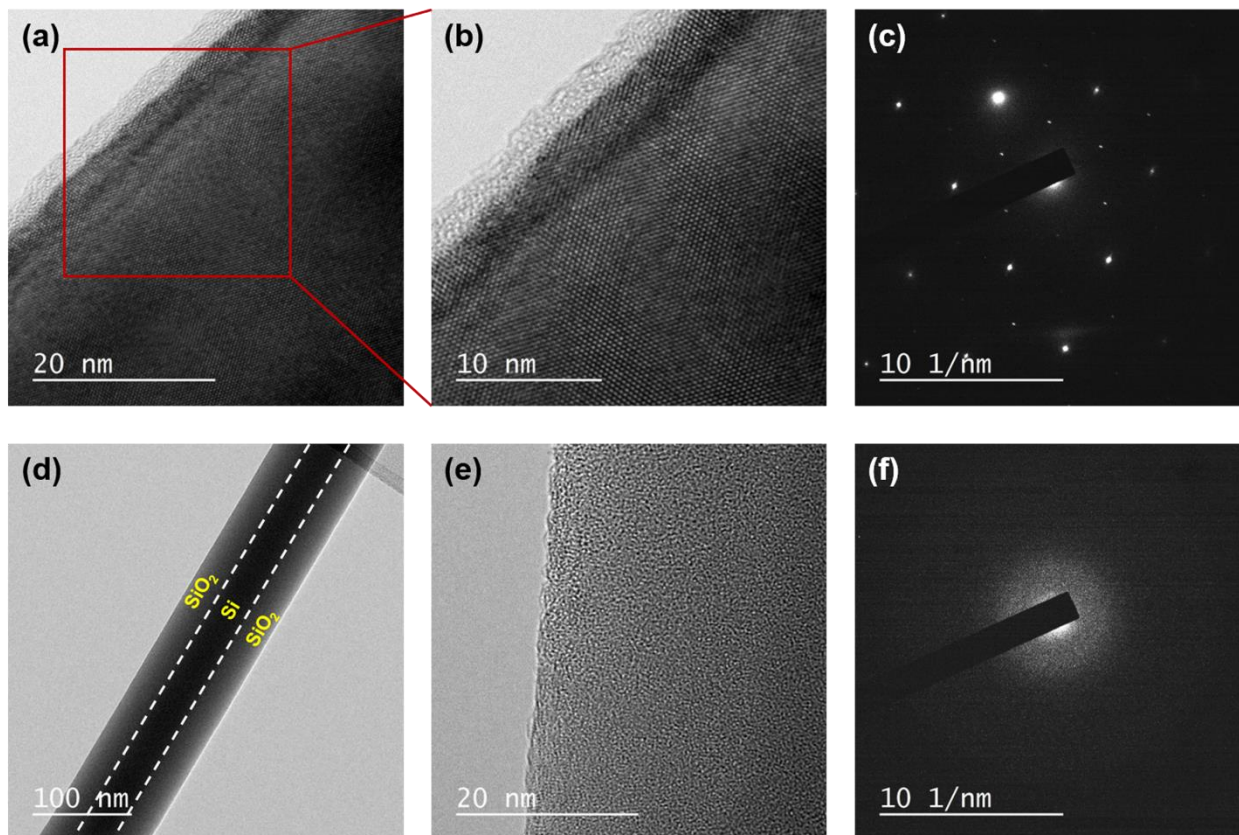

**Figure S1.** (a,b) TEM images of the pristine Si NW surface. (c) SAED pattern obtained at the position corresponding to the image of (b). (d) TEM image of oxidized Si NW having a thick SiO<sub>2</sub> layer formed by wet oxidation process. (e) Enlarged TEM image of the SiO<sub>2</sub> layer formed on the Si NW surface. (f) SAED pattern obtained from the SiO<sub>2</sub> layer.

#### 4. XPS spectra of MoS<sub>2</sub>/GCS@SiO<sub>2</sub> (G0)

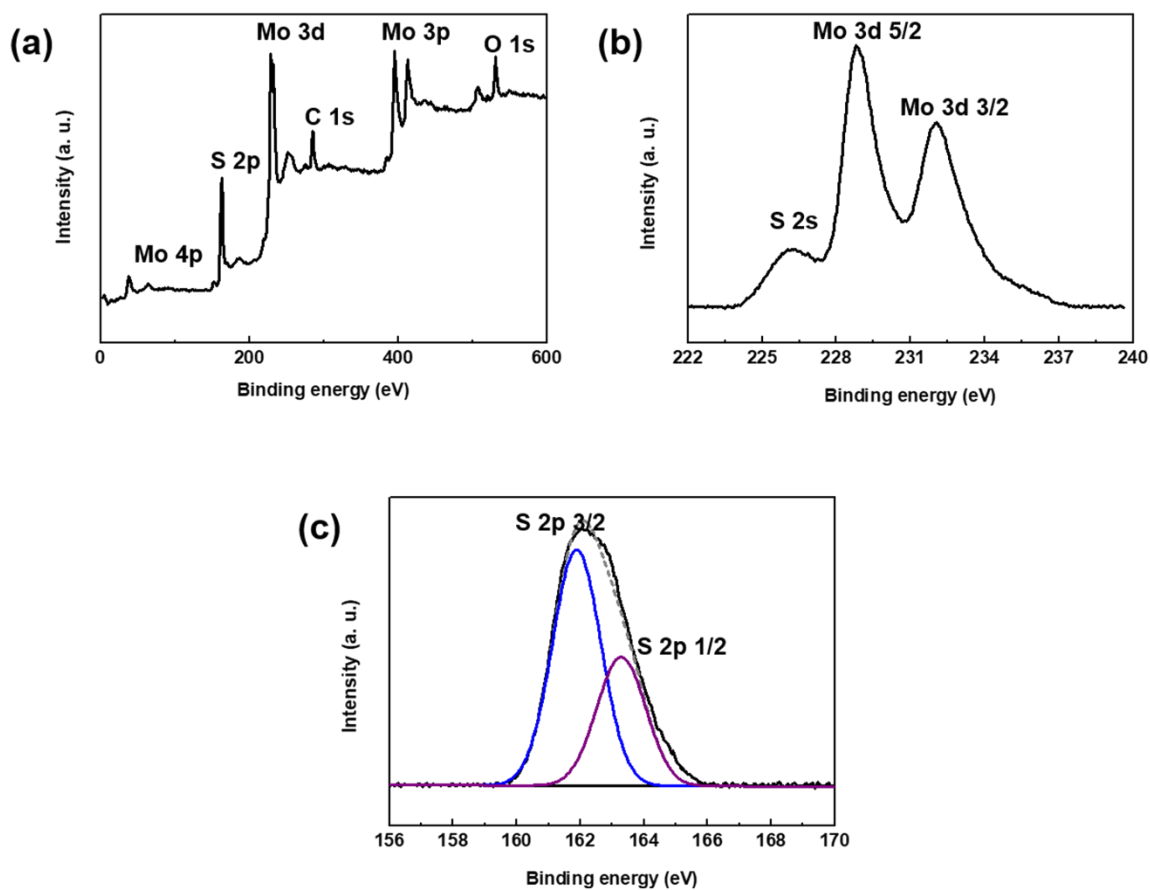

**Figure S2.** (a) Wide scan, (b) Mo 3d, and (c) S 2p XPS spectra for MoS<sub>2</sub>/GCS@SiO<sub>2</sub> (G0)

### 5. Micro-device structure for resistance measurement of GCS@SiO<sub>2</sub> NWs

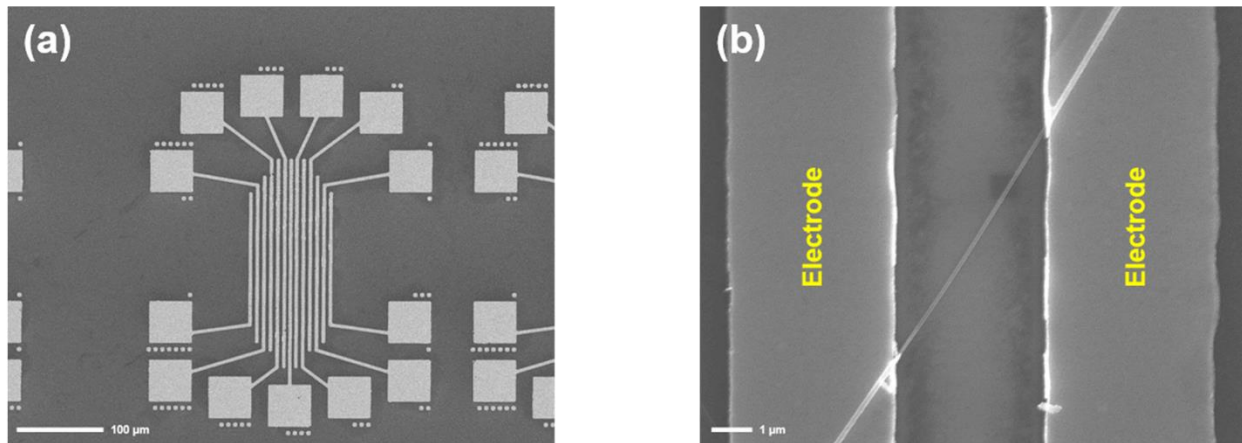

**Figure S3.** SEM images of (a) micro-device patterned for the resistance measurement of GCS@SiO<sub>2</sub> NWs and (b) a single GCS@SiO<sub>2</sub> NW loaded between two electrodes.

## 6. Resistivity of GCS@SiO<sub>2</sub> nanowires

To systematically analyze the electrical property of GCS@SiO<sub>2</sub> nanowires, the electrical resistances of “single” nanowires were measured using a micro-device consisting of two electrodes widely used in carbon nanomaterials research. For example, after a single GCS@SiO<sub>2</sub> nanowire is loaded between the electrodes, an I-V curve is measured and a resistance is calculated using Ohm’s law. Meanwhile, the resistance is affected by dimensions such as the length and cross-sectional area of the nanowire as shown in equation (3).

$$R = \rho \frac{l}{A} \quad \text{..... (3)}$$

$R$ : resistance [ $\Omega$ ]

$\rho$ : resistivity [ $\Omega \cdot \text{m}$ ]

$l$ : length of conductive channel [m]

$A$ : cross-sectional area of conductive channel [ $\text{m}^2$ ]

Therefore, high resistance values (24 ~ 94 k $\Omega$ ) for the single GCS@SiO<sub>2</sub> nanowires are obtained since the graphitic carbon shells (GCS) with very small thickness (2 ~ 10 nm) have extremely small cross-sectional areas compared to the length (several  $\mu\text{m}$ ) of the nanowires.

To help your understanding, we have calculated the resistivity ( $\rho$ ) of the nanowires through following assumptions.

1. GCS@SiO<sub>2</sub> nanowire has a perfect cylinder shape. (**Figure S4a**)
2. The diameter of the SiO<sub>2</sub> nanowire is 100 nm (**Figure S1d**), and the thickness of the GCS are estimated from TEM images. (**Figure 1b**)
3. Nanowire lies between two electrodes, and its channel length is 4  $\mu\text{m}$ .

For example, in case of GCS@SiO<sub>2</sub> (G0), the thickness of GCS (G0) estimated from TEM image is 10 nm.

$$R = \rho \frac{l}{A}$$

$$2.4 \times 10^4 \Omega = \rho \times \frac{4 \times 10^{-6} m}{\pi (60^2 - 50^2) \times 10^{-18} m^2}$$

$$\rho = 2.07 \times 10^{-5} \Omega \cdot m$$

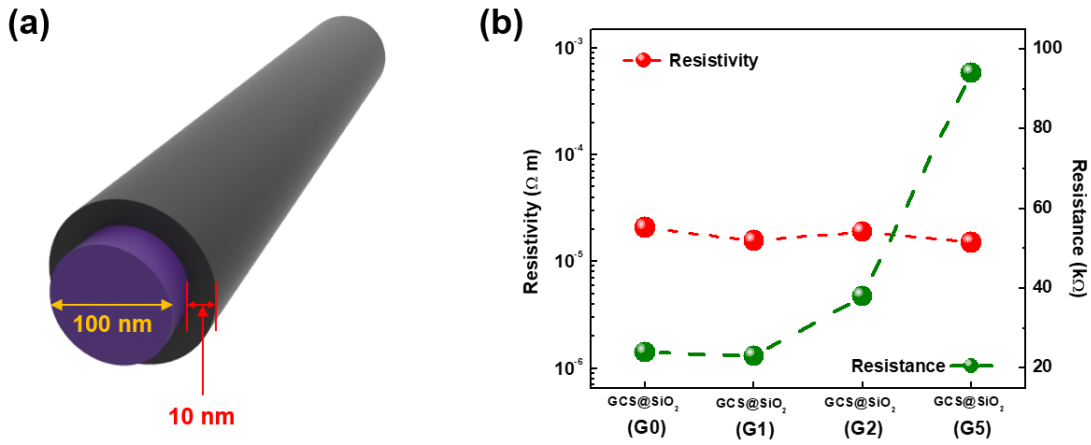

**Figure S4.** (a) Illustration of GCS@SiO<sub>2</sub> (G0) nanowire. (b) Resistivity and resistance values of GCS@SiO<sub>2</sub> (G0, G1, G2, and G5) nanowires.

The resistivity of other GCS@SiO<sub>2</sub> nanowires with 8, 6, and 2 nm thickness can be calculated in the same way. As a result, it is confirmed that the GCS@SiO<sub>2</sub> nanowires exhibit quite good electrical properties since a graphite generally has the resistivity value between  $2.5 \times 10^{-6}$  and  $5 \times 10^{-6} \Omega \cdot m$ .<sup>1</sup> Furthermore, in case of reduced graphene oxide (rGO), which has been widely used as support materials of MoS<sub>2</sub>, rGO films have the electrical conductivity of 20 ~ 100 S/cm, and the electrical resistance of the individual rGO sheet is about  $6 \times 10^6 \Omega$  when the gate voltage is zero.<sup>2,3</sup> Therefore, the resistances of the GCS@SiO<sub>2</sub> nanowires are comparable to those of general carbon materials, but they are properly controlled within an acceptable range by changing the thickness of the GCS coated on SiO<sub>2</sub> nanowire.

## 7. Electrochemical impedance spectroscopy (EIS) measurements of MoS<sub>2</sub>/GCS@SiO<sub>2</sub>

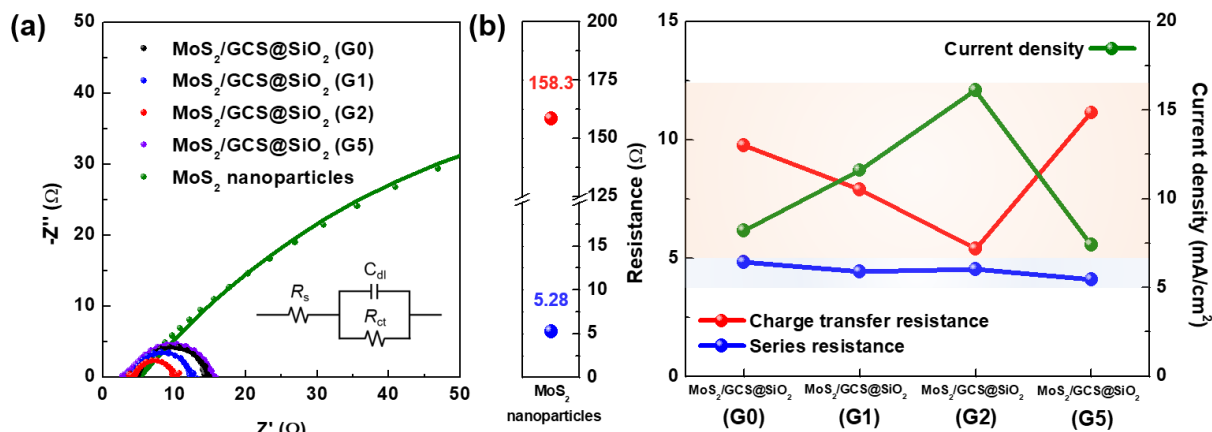

**Figure S5.** Nyquist plots of (a) MoS<sub>2</sub>/GCS@SiO<sub>2</sub> (G0, G1, G2, and G5) and MoS<sub>2</sub> nanoparticles (Inset: equivalent circuit model;  $R_s$ : series resistance,  $R_{ct}$ : charge transfer resistance,  $C_{dl}$ : double layer capacitance). (b) Correlation among  $R_{ct}$ ,  $R_s$ , and current density measured at -0.2 V for the samples.

**Table S2.** Comparison of series resistance ( $R_s$ ) and charge transfer resistance ( $R_{ct}$ ).

| Materials                                   | Series resistance ( $\Omega$ ) | Charge transfer resistance ( $\Omega$ ) |
|---------------------------------------------|--------------------------------|-----------------------------------------|
| MoS <sub>2</sub> /GCS@SiO <sub>2</sub> (G0) | 4.83                           | 9.76                                    |
| MoS <sub>2</sub> /GCS@SiO <sub>2</sub> (G1) | 4.43                           | 7.9                                     |
| MoS <sub>2</sub> /GCS@SiO <sub>2</sub> (G2) | 4.53                           | 5.39                                    |
| MoS <sub>2</sub> /GCS@SiO <sub>2</sub> (G5) | 4.1                            | 11.15                                   |
| MoS <sub>2</sub> nanoparticles              | 5.28                           | 158.3                                   |

## REFERENCES

- (1) Pierson, H. O. Handbook of Carbon, Graphite, Diamond, and Fullerenes: Properties, Processing, and Applications, p. 61, William Andrew, **1993**.
- (2) Mohan, V. B.; Brown, R.; Jayaraman, K.; Bhattacharyya, D. Characterisation of Reduced Graphene Oxide: Effects of Reduction Variables on Electrical Conductivity. Mater. Sci. Eng. B **2015**, 193, 49-60.
- (3) Gomez-Navarro, C.; Weitz, R. T.; Bittner, A. M.; Scolari, M.; Mews, A.; Burghard, M.; Kern, K. Electronic Transport Properties of Individual Chemically Reduced Graphene Oxide Sheets. Nano Lett. **2007**, 7, 3499-3503.
